# Supplementary material for: Transient Absorption Spectrum Analysis for Photothermal Catalysis Perovskite Materials
Source: MDPI journal article supplement (doi:10.3390/catal13030452), 2023-02-21
Supplement: s1 [file s1]

## Supporting Information

### Transient Absorption Spectrum Analysis for Photothermal Catalysis Perovskite Materials

Jindan Tian<sup>1\*</sup>, Lili Liu<sup>1</sup>, Hongqiang Nian<sup>1</sup>, Qiangsheng Guo<sup>2</sup>, Na Sha<sup>2\*</sup> and Zhe Zhao<sup>1,\*</sup>

<sup>1</sup>School of Material Science and Engineering, Shanghai Institute of Technology, Shanghai  
201418, China

<sup>2</sup>School of Chemical and Environment Engineering, Shanghai Institute of Technology,  
Shanghai 201418, China

\*To whom correspondence should be addressed.

**E-mail:** tjdsit@sit.edu.cn (J.T.); shanana@sit.edu.cn (N.S.); zhezhaos@sit.edu.cn (Z.Z.)

#### Contents of the Supporting Information

**Figure S1.** The different concentrations of the decay curve in  $\text{LaMn}_{0.6}\text{Ni}_{0.4}\text{O}_3$

**Figure S2.** XRD patterns of perovskite a) LCMO, b) LMNO, c) LNCO ( $x = 0, 0.2, 0.4, 0.6, 0.8, 1.0$ )

**Figure S3.** SEM images of LCMO powders synthesized by sol-gel combustion method at  $700^\circ\text{C}$  for 7h. a)  $x = 0$ , b)  $x = 0.2$ , c)  $x = 0.4$ , d)  $x = 0.6$ , e)  $x = 0.8$ , f)  $x = 1.0$

**Table S1.** The BET analysis and  $\text{CH}_4$  yield of LCMO, LMNO and LNCO ( $x = 0, 0.2, 0.4, 0.6, 0.8, 1.0$ )

**Figure S4.** UV-vis diffuse reflectance spectra of the LCMO powders ( $x = 0, 0.2, 0.4, 0.6, 0.8, 1.0$ )

**Figure S5.** The energy gap of the LCMO powders ( $x = 0, 0.2, 0.4, 0.6, 0.8, 1.0$ )

**Table S2.** The  $E_g$ , CB, VB and  $\text{CH}_4$  yield of LCMO, LMNO and LNCO ( $x = 0, 0.2, 0.4, 0.6, 0.8, 1.0$ )

**Figure S6.** Mott-Schottky plots of  $\text{LaNi}_{0.4}\text{Mn}_{0.6}\text{O}_3$ ,  $\text{LaCo}_{0.6}\text{Mn}_{0.4}\text{O}_3$ ,  $\text{LaNi}_{0.6}\text{Co}_{0.4}\text{O}_3$

**Figure S7.** The XPS spectra of (a) Co 2p, (b) Mn 2p, (c) Ni 2p, (d) O 1s of LCMO and LNCO

**Figure S8.** Two exponential decay function and fitting curve of  $\text{LaCo}_{0.6}\text{Mn}_{0.4}\text{O}_3$

**Figure S9.** The error of lifetime of LCMO, LMNO and LNCO

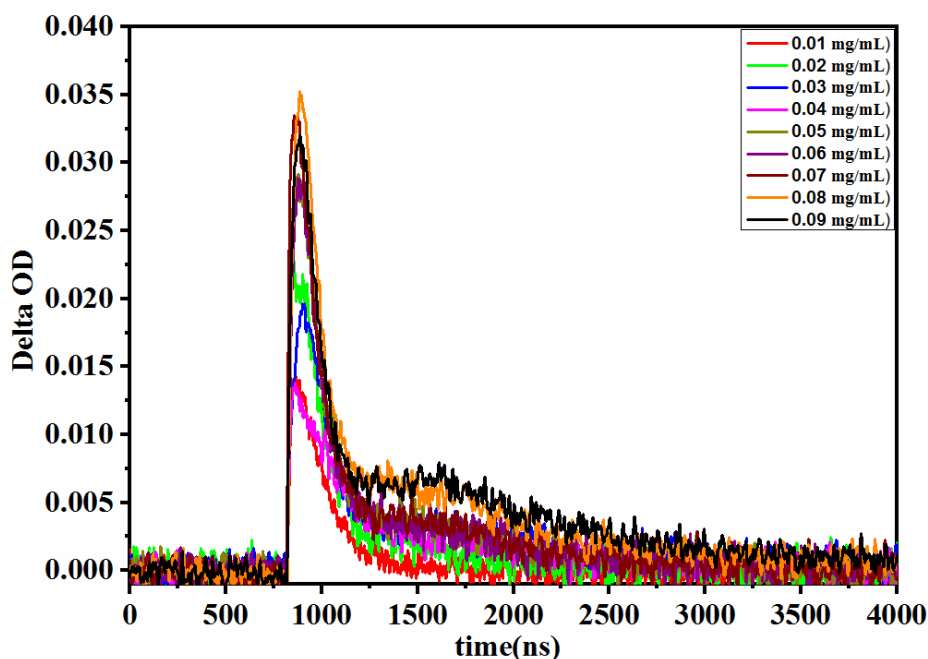

**Figure S1.** The different concentrations of the decay curve in  $\text{LaMn}_{0.6}\text{Ni}_{0.4}\text{O}_3$

Figure S1 exhibited the different concentrations of the decay curve in  $\text{LaMn}_{0.6}\text{Ni}_{0.4}\text{O}_3$ . It can be found when the concentration is too high or too low, significantly influencing the dynamic decay curve. Because catalysts are black powder, so when the concentration is too high, on the one hand, the solution is too dark for light transmission and prone to sedimentation; on the other hand, it will cause excessive carrier generation during excitation. It is well known that excessive carrier caused faster recombination or secondary excitation; the concentration is too low that excited few carriers are unsuitable for carrier monitoring. Finally, 0.05mg/mL was chosen to be the optimal concentration.

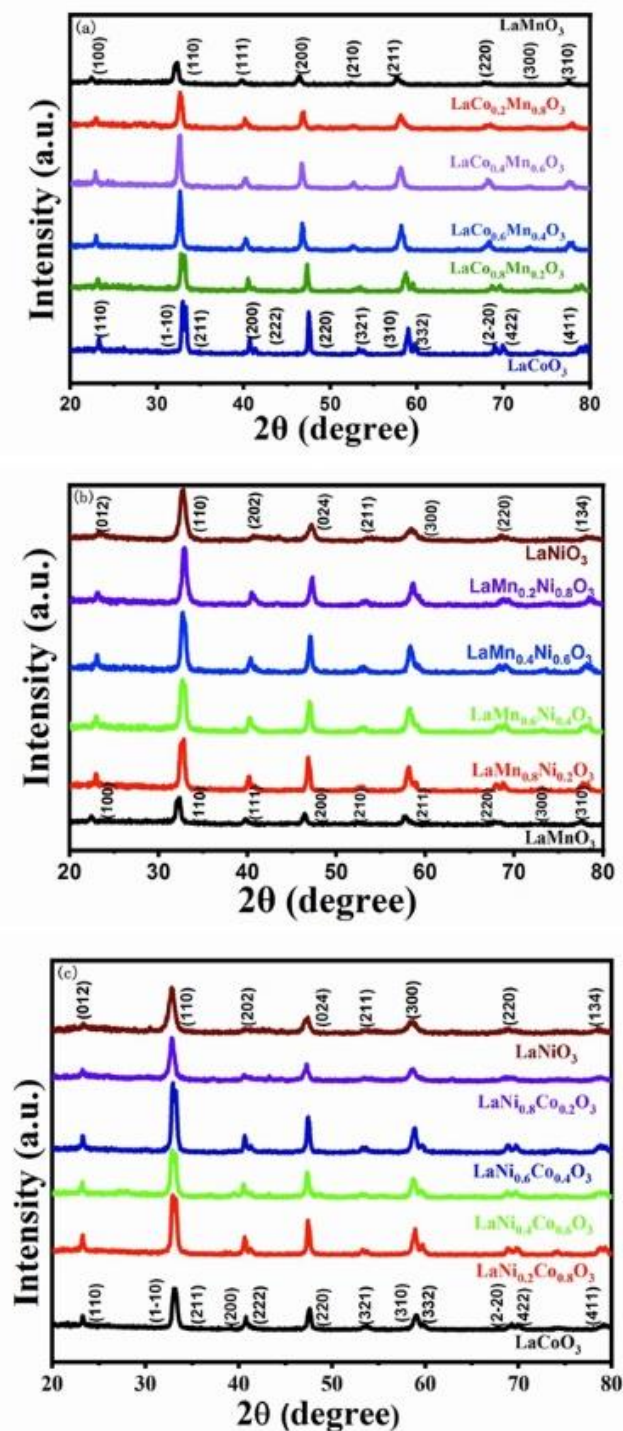

**Figure S2.** XRD patterns of perovskite a) LCMO, b) LMNO, c) LNCO ( $x = 0, 0.2, 0.4, 0.6, 0.8, 1.0$ )

Fig. S2 shows the X-ray diffraction (XRD) of LCMO, LMNO and LNCO. All catalysts were confirmed to be a pure phase with no impurities, stating that Co, Mn and Ni were successfully doped at B-sites to form a solid solution. However, the crystal shape, peak width, peak position and peak strength all change with the doping of different elements and ratios, which indicates that doping can change the crystallinity and lattice parameters. When the peak shift to a high angle means that the doping ion radius is smaller than the original metal ion. The Scherer method calculated the lattice size of LCMO, LMNO and LNCO. It was found that  $\text{LaCo}_{0.6}\text{Mn}_{0.4}\text{O}_3$ ,

$\text{LaMn}_{0.6}\text{Ni}_{0.4}\text{O}_3$  and  $\text{LaNi}_{0.6}\text{Co}_{0.4}\text{O}_3$  have the smallest lattice size in three series, which indicated the maximum lattice distortion. The distortion of perovskite crystal structure indicated that the crystal had higher system energy, while the higher system energy had higher catalytic activity. All in all, doping would be caused crystal lattice defects to promote the adsorption of reactants.

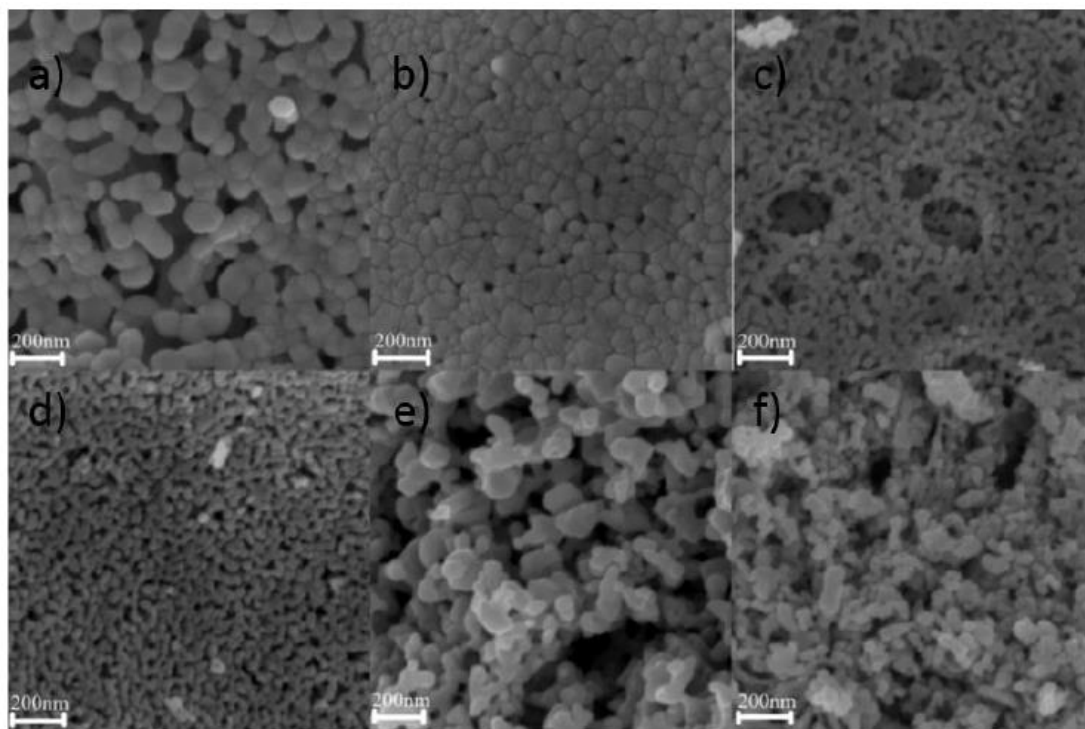

**Figure S3.** SEM images of LCMO powers synthesized by sol-gel combustion method at 700°C for 7h. a)  $x = 0$ , b)  $x = 0.2$ , c)  $x = 0.4$ , d)  $x = 0.6$ , e)  $x = 0.8$ , f)  $x = 1.0$ .

SEM characterized the morphological features. It can be seen that all samples are porous material. Porous materials are beneficial to  $\text{CO}_2$  adsorption and promote surface reactions. For LCMO, when  $x=0, 0.8, 1$ , the particle size is relatively uneven, and there are many aggregations. When  $\text{Co}=0.2, 0.4, 0.6$ , the particle size gradually becomes uniform with less agglomeration, the porosity increases correspondingly, and the pores between particles are connected to each other. It can be clearly seen that  $x=0.6$  shows the best morphology, and the overall distribution of  $x=0.6$  is the pore structure formed by the connection of particles, which is conducive to the storage and transmission of reaction products in the catalytic reaction. LMNO and LNCO have similar laws; we will not list them here.

**Table S1.** The BET analysis and CH<sub>4</sub> yield of LCMO, LMNO and LNCO (x = 0, 0.2, 0.4, 0.6, 0.8, 1.0)

| Sample                                               | Surface area (BET) m <sup>2</sup> /g | Pore size (nm) | CH <sub>4</sub> yield(umol/g) |
|------------------------------------------------------|--------------------------------------|----------------|-------------------------------|
| LaCoO <sub>3</sub>                                   | 21.99                                | 17.651         | 130.65                        |
| LaCo <sub>0.2</sub> Mn <sub>0.8</sub> O <sub>3</sub> | 9.12                                 | 18.39          | 349.87                        |
| LaCo <sub>0.4</sub> Mn <sub>0.6</sub> O <sub>3</sub> | 22.82                                | 23.43          | 471.90                        |
| LaCo <sub>0.6</sub> Mn <sub>0.4</sub> O <sub>3</sub> | 19.51                                | 27.43          | 510.68                        |
| LaCo <sub>0.8</sub> Mn <sub>0.2</sub> O <sub>3</sub> | 10.80                                | 20.38          | 250.96                        |
| LaMnO <sub>3</sub>                                   | 21.99                                | 17.65          | 340.49                        |
| LaMn <sub>0.2</sub> Ni <sub>0.8</sub> O <sub>3</sub> | 10.56                                | 18.39          | 342.31                        |
| LaMn <sub>0.4</sub> Ni <sub>0.6</sub> O <sub>3</sub> | 15.57                                | 23.43          | 429.59                        |
| LaMn <sub>0.6</sub> Ni <sub>0.4</sub> O <sub>3</sub> | 21.60                                | 27.43          | 573.26                        |
| LaMn <sub>0.8</sub> Ni <sub>0.2</sub> O <sub>3</sub> | 22.22                                | 20.38          | 291.55                        |
| LaNiO <sub>3</sub>                                   | 4.11                                 | 30.38          | 107.80                        |
| LaNi <sub>0.2</sub> Co <sub>0.8</sub> O <sub>3</sub> | 10.06                                | 30.42          | 187.43                        |
| LaNi <sub>0.4</sub> Co <sub>0.6</sub> O <sub>3</sub> | 13.40                                | 23.27          | 164.17                        |
| LaNi <sub>0.6</sub> Co <sub>0.4</sub> O <sub>3</sub> | 6.51                                 | 36.90          | 358.52                        |
| LaNi <sub>0.8</sub> Co <sub>0.2</sub> O <sub>3</sub> | 2.66                                 | 34.75          | 348.91                        |

Table S1 shows the specific surface area, pore diameter and CH<sub>4</sub> yield of LCMO, LMNO and LNCO catalysts. The specific surface area at 4.11~22.82 m<sup>2</sup>/g can be considered a porous material. It can be seen from table S1 that the pore size changes with the doping value, but there is no consistent trend among different materials. Compared to pure LaNiO<sub>3</sub>, LaCoO<sub>3</sub> and LaMnO<sub>3</sub>, the influence of doping on the specific surface area has no particular law. However, for the most part, doping can effectively increase the specific surface area of the catalyst. From the catalytic results, the specific surface area does not correspond to the catalytic activity of the catalyst, so it can be said that the specific surface area cannot be used as a primary factor to judge the catalytic activity.

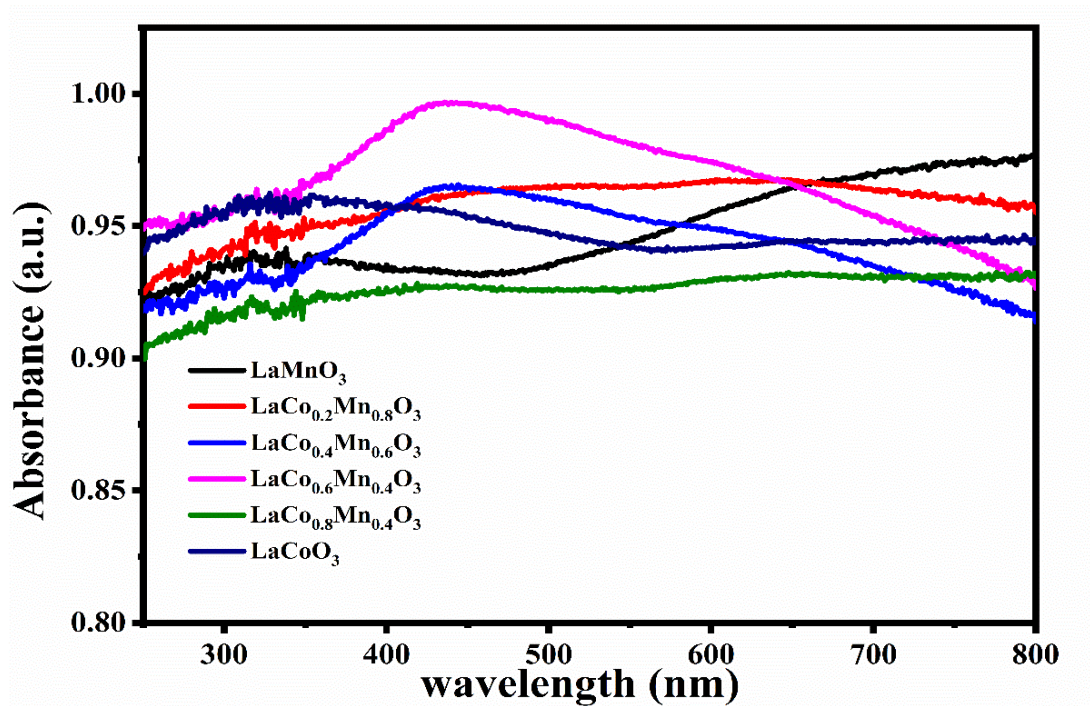

Figure S4. UV-vis diffuse reflectance spectra of the LCMO powders ( $x = 0, 0.2, 0.4, 0.6, 0.8, 1.0$ )

In the LCMO UV-diffuse reflectance spectrum, it can be seen that the compounds show strong absorption in the wavelength range of 200-800nm, which means that the catalyst has a strong response from UV to visible light. In other words, the catalysts have a solid response to visible light, representing that visible light can ultimately drive photocatalytic reactions. The same is true of the other two series (LMNO, LNCO)

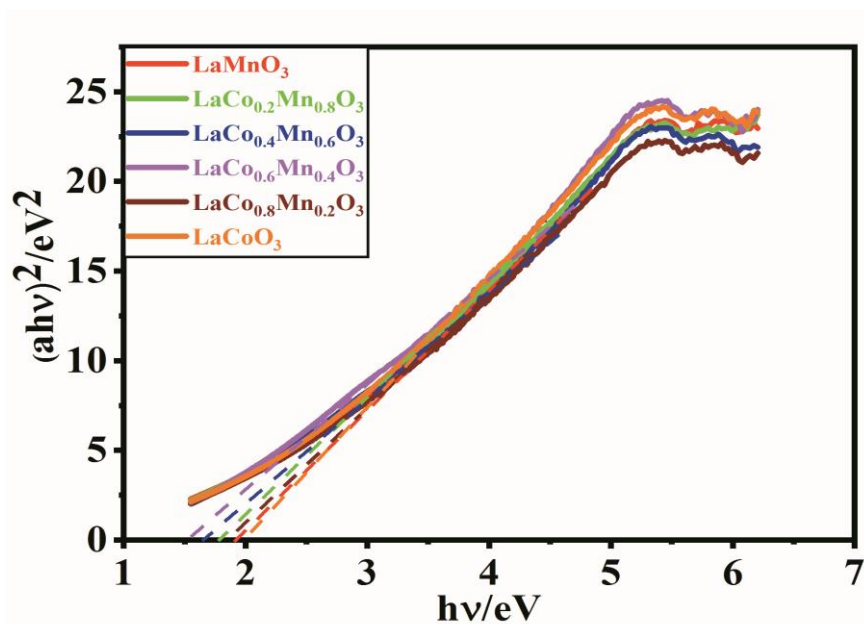

Figure S5. The energy gap of the LCMO powders ( $x = 0, 0.2, 0.4, 0.6, 0.8, 1.0$ )

To estimate the catalysts' optical band gap ( $E_g$ ), the Tauc equation was used to fit  $E_g$  of the catalysts. Fig. S5 shows the  $E_g$  of LCMO powders. As far as we know,  $E_g$  not only

determines the choice of the photo-responsive region but also reflects the mobility of electrons from the valence to the conduction band. Lower  $E_g$  can absorb visible light more effectively and facilitate the separation of electrons-holes pairs from the valence to the conduction band, potentially improving the photocatalytic performance. Obviously, B-doping can effectively reduce  $E_g$ .

**Table S2.** The  $E_g$ , CB, VB and  $\text{CH}_4$  yield of LCMO, LMNO and LNCO ( $x = 0, 0.2, 0.4, 0.6, 0.8, 1.0$ )

| Sample                                       | $E_g$ (eV) | CB    | VB   | $\text{CH}_4$ yield( $\mu\text{mol/g}$ ) |
|----------------------------------------------|------------|-------|------|------------------------------------------|
| $\text{LaCoO}_3$                             | 1.86       | -0.31 | 1.55 | 130.65                                   |
| $\text{LaCo}_{0.2}\text{Mn}_{0.8}\text{O}_3$ | 1.68       | -0.28 | 1.40 | 349.87                                   |
| $\text{LaCo}_{0.4}\text{Mn}_{0.6}\text{O}_3$ | 1.77       | -0.26 | 1.51 | 471.90                                   |
| $\text{LaCo}_{0.6}\text{Mn}_{0.4}\text{O}_3$ | 1.38       | -0.30 | 1.08 | 510.68                                   |
| $\text{LaCo}_{0.8}\text{Mn}_{0.2}\text{O}_3$ | 1.81       | -0.27 | 1.54 | 250.96                                   |
| $\text{LaMnO}_3$                             | 1.83       | -0.24 | 1.59 | 340.49                                   |
| $\text{LaMn}_{0.2}\text{Ni}_{0.8}\text{O}_3$ | 1.79       | -0.27 | 1.52 | 342.31                                   |
| $\text{LaMn}_{0.4}\text{Ni}_{0.6}\text{O}_3$ | 1.82       | -0.28 | 1.54 | 429.59                                   |
| $\text{LaMn}_{0.6}\text{Ni}_{0.4}\text{O}_3$ | 1.50       | -0.24 | 1.26 | 573.26                                   |
| $\text{LaMn}_{0.8}\text{Ni}_{0.2}\text{O}_3$ | 1.52       | -0.24 | 1.28 | 291.55                                   |
| $\text{LaNiO}_3$                             | 1.78       | -0.27 | 1.51 | 107.80                                   |
| $\text{LaNi}_{0.2}\text{Co}_{0.8}\text{O}_3$ | 1.48       | -0.25 | 1.23 | 187.43                                   |
| $\text{LaNi}_{0.4}\text{Co}_{0.6}\text{O}_3$ | 1.42       | -0.24 | 1.18 | 164.17                                   |
| $\text{LaNi}_{0.6}\text{Co}_{0.4}\text{O}_3$ | 1.45       | -0.25 | 1.20 | 358.52                                   |
| $\text{LaNi}_{0.8}\text{Co}_{0.2}\text{O}_3$ | 1.69       | -0.26 | 1.13 | 348.91                                   |

The CB was fitted by the mott-Schottky diagram (Figure S6), and the  $E_g$  value was obtained by DRS spectral. The VB value can also be calculated through the formula  $E_{\text{CB}} = E_{\text{VB}} - E_g$ . Tab. S2 showed the  $E_g$ , CB and VB values of all B-doped solid solution catalysts, which indicated that B-doped catalysts had lower  $E_g$  than those of the pure catalysts. From the catalytic results, the value of  $E_g$  does not correspond to the catalytic activity. This conclusion is similar to the results of BET. It can be concluded that there is a specific relationship between the  $E_g$  and the catalytic activity.

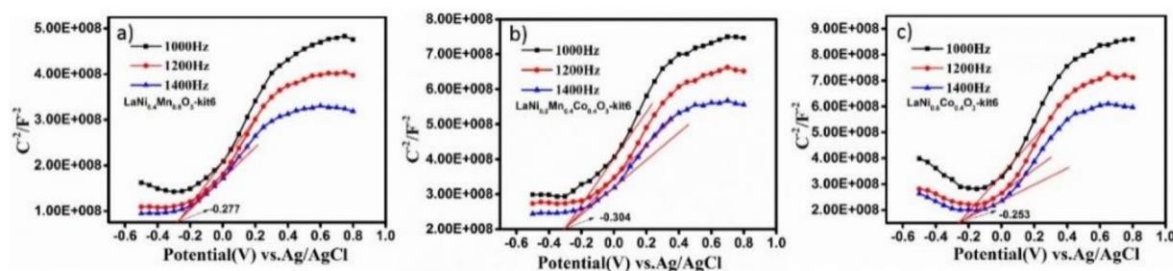

**Figure S6.** Mott-Schottky plots of  $\text{LaNi}_{0.4}\text{Mn}_{0.6}\text{O}_3$ ,  $\text{LaCo}_{0.6}\text{Mn}_{0.4}\text{O}_3$ ,  $\text{LaNi}_{0.6}\text{Co}_{0.4}\text{O}_3$



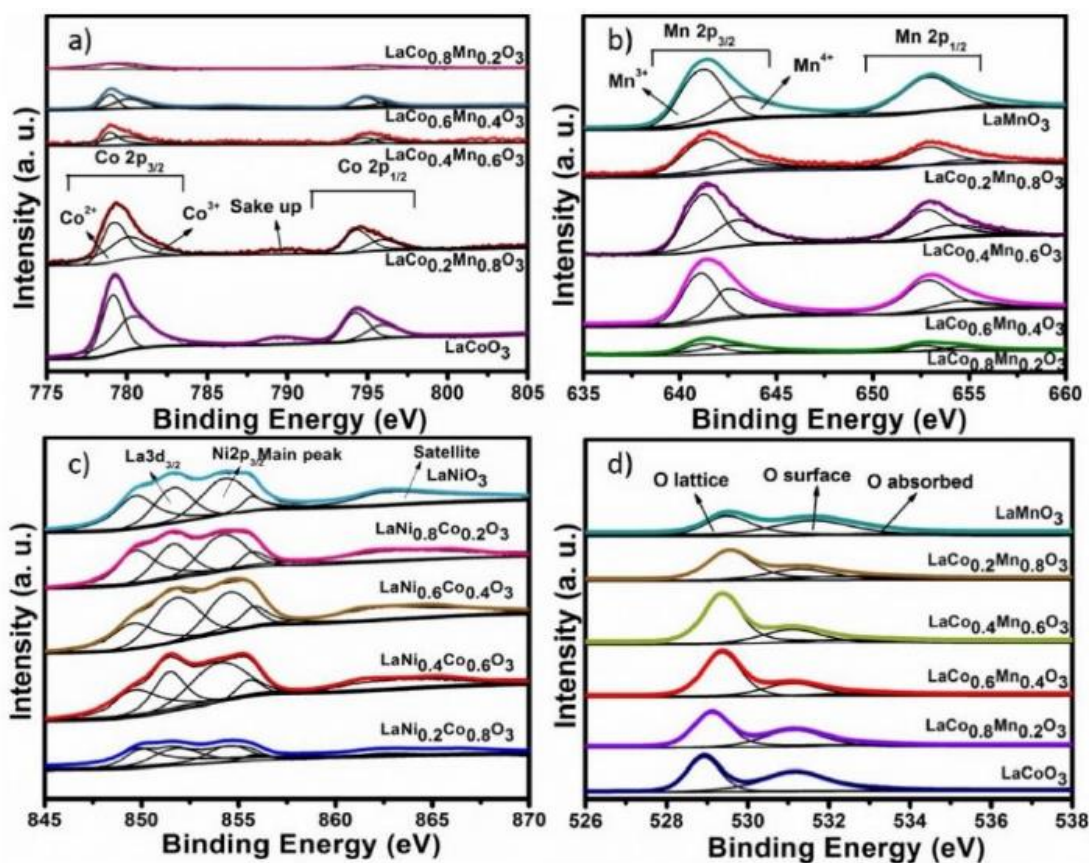

**Figure S7.** The XPS spectra of (a) Co 2p, (b) Mn 2p, (c) Ni 2p, (d) O 1s of LCMO and LNCO

As shown in Fig. S7, the chemical valence and surface morphology of the elements in LCMO, LMNO and LNCO catalysts were analyzed by XPS. The results show that the elements contained La, Co, Mn, Ni, O and C in all samples, and no peaks of other elements appear. The binding energy in the spectrum proves that there are at least two oxidation states of ions. As shown in the Fig. S7a, Co exists in two oxidation states,  $\text{Co}^{2+}$  and  $\text{Co}^{3+}$ . High binding energy corresponds to  $\text{Co}^{3+}$ , and low binding energy corresponds to  $\text{Co}^{2+}$ . Similarly, two major peaks corresponding to  $\text{Mn } 2p_{3/2}$  and  $\text{Mn } 2p_{1/2}$  were observed at 641.8 and 653.5eV, respectively (Fig. S7b). The strength of peak  $\text{Mn}^{4+}$  increased with the doping ratio, while the  $\text{Mn}^{3+}$  showed an opposite trend to balance the charge. Because the binding energy of the  $\text{Ni } 2p_{3/2}$  peak is almost the same as that of the satellite peak of  $\text{La } 3d_{3/2}$  in LNCO, these peaks overlap, analyzing Ni ion valences difficult (Fig. S7c). Oxygen has three oxidation states: lattice oxygen, surface oxygen and adsorbed oxygen (Fig. S5d). The surface oxygen increased with the different doping ratios, which indicates that doping can effectively improve the adsorption capacity of reactants.



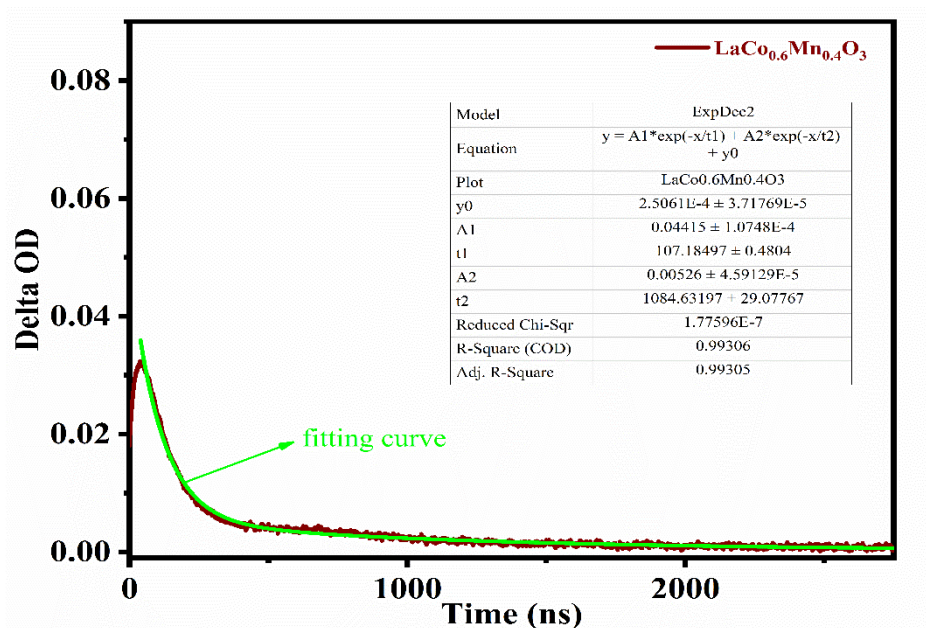

Figure S8. Two exponential decay function and fitting curve of LaCo<sub>0.6</sub>Mn<sub>0.4</sub>O<sub>3</sub>

|                 |                                                        |                 |                                                        |                 |                                                        |
|-----------------|--------------------------------------------------------|-----------------|--------------------------------------------------------|-----------------|--------------------------------------------------------|
| Model           | ExpDec2                                                | Model           | ExpDec2                                                | Model           | ExpDec2                                                |
| Equation        | $y = A1 \cdot \exp(-x/t1) + A2 \cdot \exp(-x/t2) + y0$ | Equation        | $y = A1 \cdot \exp(-x/t1) + A2 \cdot \exp(-x/t2) + y0$ | Equation        | $y = A1 \cdot \exp(-x/t1) + A2 \cdot \exp(-x/t2) + y0$ |
| Plot            | LaCoO3                                                 | Plot            | LaCo0.2Mn0.8O3                                         | Plot            | LaCo0.4Mn0.6O3                                         |
| y0              | $0.00103 \pm 2.6581E-5$                                | y0              | $1.41012E-4 \pm 2.34163E-5$                            | y0              | $1.7103E-4 \pm 2.07843E-5$                             |
| A1              | $0.01481 \pm 7.61746E-5$                               | A1              | $0.04519 \pm 6.01022E-5$                               | A1              | $0.04565 \pm 6.27754E-5$                               |
| t1              | $69.9736 \pm 0.73039$                                  | t1              | $105.23343 \pm 0.28548$                                | t1              | $103.60735 \pm 0.28612$                                |
| A2              | $0.0032 \pm 5.78295E-5$                                | A2              | $0.00356 \pm 3.50386E-5$                               | A2              | $0.00366 \pm 3.65915E-5$                               |
| t2              | $559.88803 \pm 21.53735$                               | t2              | $958.25689 \pm 30.21458$                               | t2              | $1030.28778 \pm 42.39984$                              |
| Reduced Chi-Sqr | $9.0747E-8$                                            | Reduced Chi-Sqr | $9.52156E-8$                                           | Reduced Chi-Sqr | $8.90735E-8$                                           |
| R-Square (COD)  | 0.98476                                                | R-Square (COD)  | 0.99698                                                | R-Square (COD)  | 0.99696                                                |
| Adj. R-Square   | 0.98475                                                | Adj. R-Square   | 0.99698                                                | Adj. R-Square   | 0.99696                                                |

  

|                 |                                                        |                 |                                                        |                 |                                                        |
|-----------------|--------------------------------------------------------|-----------------|--------------------------------------------------------|-----------------|--------------------------------------------------------|
| Model           | ExpDec2                                                | Model           | ExpDec2                                                | Model           | ExpDec2                                                |
| Equation        | $y = A1 \cdot \exp(-x/t1) + A2 \cdot \exp(-x/t2) + y0$ | Equation        | $y = A1 \cdot \exp(-x/t1) + A2 \cdot \exp(-x/t2) + y0$ | Equation        | $y = A1 \cdot \exp(-x/t1) + A2 \cdot \exp(-x/t2) + y0$ |
| Plot            | LaCo0.6Mn0.4O3                                         | Plot            | LaCo0.8Mn0.2O3                                         | Plot            | LaMnO3                                                 |
| y0              | $2.5061E-4 \pm 3.71769E-5$                             | y0              | $3.60526E-4 \pm 1.91409E-5$                            | y0              | $-6.82332E-4 \pm 5.28277E-5$                           |
| A1              | $0.04415 \pm 1.0748E-4$                                | A1              | $0.01539 \pm 9.77918E-5$                               | A1              | $0.09307 \pm 1.33686E-4$                               |
| t1              | $107.18497 \pm 0.4804$                                 | t1              | $158.98094 \pm 1.60866$                                | t1              | $71.84606 \pm 0.17762$                                 |
| A2              | $0.00526 \pm 4.59129E-5$                               | A2              | $0.00249 \pm 1.00634E-4$                               | A2              | $0.00153 \pm 4.06588E-5$                               |
| t2              | $1084.63197 \pm 29.07767$                              | t2              | $810.33213 \pm 41.20567$                               | t2              | $929.03713 \pm 36.64412$                               |
| Reduced Chi-Sqr | $1.77596E-7$                                           | Reduced Chi-Sqr | $8.86664E-8$                                           | Reduced Chi-Sqr | $3.53203E-7$                                           |
| R-Square (COD)  | 0.99306                                                | R-Square (COD)  | 0.98663                                                | R-Square (COD)  | 0.99536                                                |
| Adj. R-Square   | 0.99305                                                | Adj. R-Square   | 0.98663                                                | Adj. R-Square   | 0.99536                                                |

  

|                 |                                                        |                 |                                                        |                 |                                                        |
|-----------------|--------------------------------------------------------|-----------------|--------------------------------------------------------|-----------------|--------------------------------------------------------|
| Model           | ExpDec2                                                | Model           | ExpDec2                                                | Model           | ExpDec2                                                |
| Equation        | $y = A1 \cdot \exp(-x/t1) + A2 \cdot \exp(-x/t2) + y0$ | Equation        | $y = A1 \cdot \exp(-x/t1) + A2 \cdot \exp(-x/t2) + y0$ | Equation        | $y = A1 \cdot \exp(-x/t1) + A2 \cdot \exp(-x/t2) + y0$ |
| Plot            | LaMn0.2Ni0.8O3                                         | Plot            | LaMn0.4Ni0.6O3                                         | Plot            | LaMn0.6Ni0.4O3                                         |
| y0              | $2.44894E-4 \pm 5.82163E-5$                            | y0              | $-4.97285E-4 \pm 8.40508E-5$                           | y0              | $8.0139E-5 \pm 2.33041E-4$                             |
| A1              | $0.03933 \pm 2.04932E-4$                               | A1              | $0.0522 \pm 7.58674E-5$                                | A1              | $0.06029 \pm 2.30665E-4$                               |
| t1              | $106.39159 \pm 0.98597$                                | t1              | $103.39602 \pm 0.30484$                                | t1              | $95.198 \pm 0.54337$                                   |
| A2              | $0.00354 \pm 9.20399E-5$                               | A2              | $0.00481 \pm 4.67219E-5$                               | A2              | $0.00483 \pm 1.62835E-4$                               |
| t2              | $943.15531 \pm 63.78419$                               | t2              | $1005.46824 \pm 45.15981$                              | t2              | $1884.0223 \pm 188.55227$                              |
| Reduced Chi-Sqr | $3.92063E-7$                                           | Reduced Chi-Sqr | $1.72967E-7$                                           | Reduced Chi-Sqr | $5.16949E-7$                                           |
| R-Square (COD)  | 0.97623                                                | R-Square (COD)  | 0.99633                                                | R-Square (COD)  | 0.98461                                                |
| Adj. R-Square   | 0.97622                                                | Adj. R-Square   | 0.99632                                                | Adj. R-Square   | 0.9846                                                 |

| Model           | ExpDec2                                                | Model           | ExpDec2                                                | Model           | ExpDec2                                                |
|-----------------|--------------------------------------------------------|-----------------|--------------------------------------------------------|-----------------|--------------------------------------------------------|
| Equation        | $y = A1 \cdot \exp(-x/t1) + A2 \cdot \exp(-x/t2) + y0$ | Equation        | $y = A1 \cdot \exp(-x/t1) + A2 \cdot \exp(-x/t2) + y0$ | Equation        | $y = A1 \cdot \exp(-x/t1) + A2 \cdot \exp(-x/t2) + y0$ |
| Plot            | LaMn0.2Ni0.2O3                                         | Plot            | LaNiO3                                                 | Plot            | LaNi0.2Co0.8O3                                         |
| y0              | $5.64194E-4 \pm 1.32261E-4$                            | y0              | $9.35248E-4 \pm 1.12567E-5$                            | y0              | $6.93307E-4 \pm 1.10232E-5$                            |
| A1              | $0.03309 \pm 1.83352E-4$                               | A1              | $0.013678 \pm 6.45981E-5$                              | A1              | $0.02666 \pm 8.21478E-5$                               |
| t1              | $121.06647 \pm 1.3571$                                 | t1              | $83.36753 \pm 1.36748$                                 | t1              | $88.76911 \pm 0.54262$                                 |
| A2              | $0.00384 \pm 7.42365E-5$                               | A2              | $0.00456 \pm 5.69341E-5$                               | A2              | $0.00887 \pm 7.70153E-5$                               |
| t2              | $900.01315 \pm 21.23$                                  | t2              | $382.56842 \pm 6.47942$                                | t2              | $573.33585 \pm 5.75224$                                |
| Reduced Chi-Sqr | $3.82593E-7$                                           | Reduced Chi-Sqr | $8.76392E-8$                                           | Reduced Chi-Sqr | $1.24554E-7$                                           |
| R-Square (COD)  | 0.97607                                                | R-Square (COD)  | 0.98956                                                | R-Square (COD)  | 0.99422                                                |
| Adj. R-Square   | 0.97606                                                | Adj. R-Square   | 0.98954                                                | Adj. R-Square   | 0.99421                                                |

  

| Model           | ExpDec2                                                | Model           | ExpDec2                                                | Model           | ExpDec2                                                |
|-----------------|--------------------------------------------------------|-----------------|--------------------------------------------------------|-----------------|--------------------------------------------------------|
| Equation        | $y = A1 \cdot \exp(-x/t1) + A2 \cdot \exp(-x/t2) + y0$ | Equation        | $y = A1 \cdot \exp(-x/t1) + A2 \cdot \exp(-x/t2) + y0$ | Equation        | $y = A1 \cdot \exp(-x/t1) + A2 \cdot \exp(-x/t2) + y0$ |
| Plot            | LaNi0.4Co0.6O3                                         | Plot            | LaNi0.6Co0.4O3                                         | Plot            | Ni0.8Co0.2                                             |
| y0              | $2.9362E-4 \pm 1.07145E-5$                             | y0              | $0.00106 \pm 2.22346E-5$                               | y0              | $8.34462E-4 \pm 1.63975E-5$                            |
| A1              | $0.02588 \pm 1.03069E-4$                               | A1              | $0.03326 \pm 8.64923E-5$                               | A1              | $0.03634 \pm 8.87869E-5$                               |
| t1              | $100.60057 \pm 0.55947$                                | t1              | $95.79422 \pm 0.50681$                                 | t1              | $91.82478 \pm 0.45433$                                 |
| A2              | $0.00498 \pm 1.00199E-4$                               | A2              | $0.00858 \pm 5.96548E-5$                               | A2              | $0.00721 \pm 7.42381E-5$                               |
| t2              | $532.30612 \pm 10.77637$                               | t2              | $980.45426 \pm 10.78608$                               | t2              | $955.84573 \pm 9.95398$                                |
| Reduced Chi-Sqr | $1.37458E-7$                                           | Reduced Chi-Sqr | $1.7702E-7$                                            | Reduced Chi-Sqr | $1.77399E-7$                                           |
| R-Square (COD)  | 0.99403                                                | R-Square (COD)  | 0.99353                                                | R-Square (COD)  | 0.99383                                                |
| Adj. R-Square   | 0.99403                                                | Adj. R-Square   | 0.99352                                                | Adj. R-Square   | 0.99382                                                |

**Figure S9.** The error of lifetime of LCMO, LMNO and LNCO
