# Supplementary material for: Transient Absorption Spectrum Analysis for Photothermal Catalysis Perovskite Materials
Source: MDPI journal article supplement (doi:10.3390/catal13030452), 2023-02-21
Supplement: s1 [file s1]

Archive with 1 entries (1 files):
- catalysts-2175698-supplementary.pdf
